# Supplementary material
Source: publisher figshare collection journal article supplement (https://f1000.figshare.com/articles/dataset/_/106725)
Supplement: Supplementary file 2 [file 1]

| Table format:<br>Grouped |      | Group A    |      |      |      | Group B    |      |      |      |
|--------------------------|------|------------|------|------|------|------------|------|------|------|
|                          |      | Data Set-A |      |      |      | Data Set-B |      |      |      |
|                          |      | A:Y1       | A:Y2 | A:Y3 | A:Y4 | B:Y1       | B:Y2 | B:Y3 | B:Y4 |
| 1                        | 1:4  |            |      |      |      |            |      |      |      |
| 2                        | 1:8  |            |      |      |      |            |      |      |      |
| 3                        | 1:16 |            |      |      |      |            |      |      |      |
| 4                        | 1:32 |            |      |      |      |            |      |      |      |

|   | Group C |      |       |       | Group D |      |       |       |      |
|---|---------|------|-------|-------|---------|------|-------|-------|------|
|   | XY24TL  |      |       |       | XY27FD  |      |       |       |      |
|   | C:Y1    | C:Y2 | C:Y3  | C:Y4  | D:Y1    | D:Y2 | D:Y3  | D:Y4  | E:Y1 |
| 1 | 7.1     | 12.6 | 5.79  | 15.62 | 10.2    | 23.6 | 8.58  | 28.82 | 3.0  |
| 2 | 20.6    | 24.8 | 17.94 | 30.26 | 24.0    | 29.4 | 21.00 | 35.78 | 13.0 |
| 3 | 48.7    | 50.0 | 43.23 | 60.50 | 41.0    | 56.0 | 36.30 | 67.70 | 34.2 |
| 4 | 63.0    | 68.0 | 56.10 | 82.10 | 59.0    | 67.0 | 52.50 | 80.90 | 55.0 |

|   | Group E |       |       | Group F     |      |      |      |
|---|---------|-------|-------|-------------|------|------|------|
|   | HIDEM 1 |       |       | LGMD2D Pt.9 |      |      |      |
|   | E:Y2    | E:Y3  | E:Y4  | F:Y1        | F:Y2 | F:Y3 | F:Y4 |
| 1 | 5.3     | 2.10  | 6.86  | 1.0         | 4.0  |      |      |
| 2 | 6.0     | 11.10 | 7.70  | 18.0        | 13.0 |      |      |
| 3 | 46.0    | 30.18 | 55.70 | 39.0        | 38.1 |      |      |
| 4 | 53.0    | 48.90 | 64.10 | 50.0        | 59.0 |      |      |
